# Supplementary material for: Self-Assembled Alkylated Polyamine Analogs as Supramolecular Anticancer Agents
Source: MDPI journal article supplement (doi:10.3390/molecules27082441), 2022-04-10
Supplement: s1 [file s1]

## **Supporting information for “Self-assembled alkylated polyamine analogs as supramolecular anticancer agents”**

Diptesh Sil<sup>1</sup>, Sudipta Panja<sup>1</sup>, Chinmay M. Jogdeo<sup>1</sup>, Raj Kumar<sup>1</sup>, Ao Yu<sup>1</sup>, Cassandra E. Holbert<sup>2</sup>, Ling Ding<sup>1</sup>, Jack-son R. Foley<sup>2</sup>, Tracy Murray Stewart<sup>2</sup>, Robert A. Casero, Jr.<sup>2</sup>, David Oupický<sup>1,\*</sup>

<sup>1</sup>Department of Pharmaceutical Sciences, Center for Drug Delivery and Nanomedicine, University of Nebraska Medical Center, Omaha, NE 68198, USA

<sup>2</sup>Sidney Kimmel Comprehensive Cancer Center, Johns Hopkins School of Medicine, Baltimore, MD 21231, USA

\*Correspondence: david.oupicky@unmc.edu.

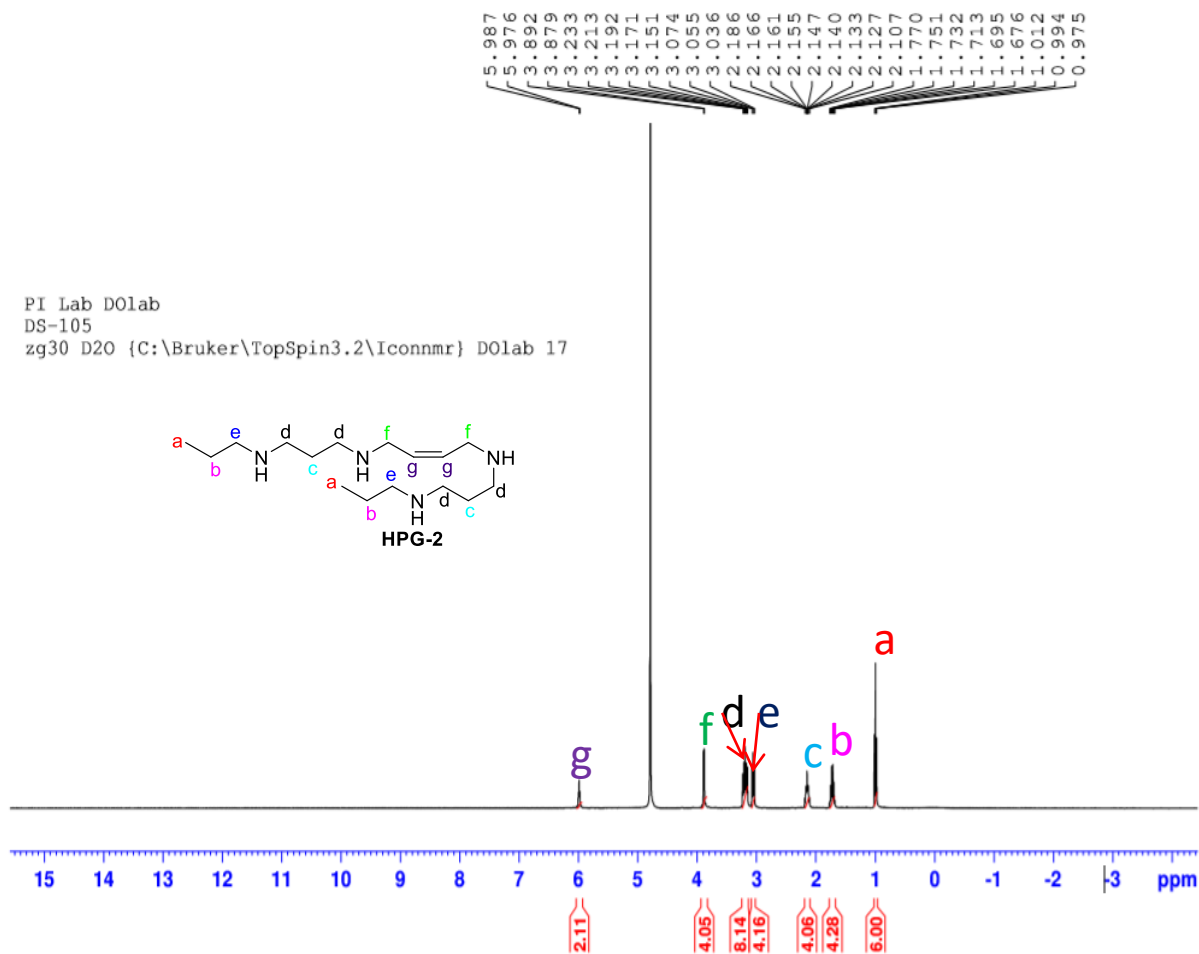

**Figure S1.**  $^1\text{H}$  NMR with  $\text{C}_3$  side chain (HPG-2)

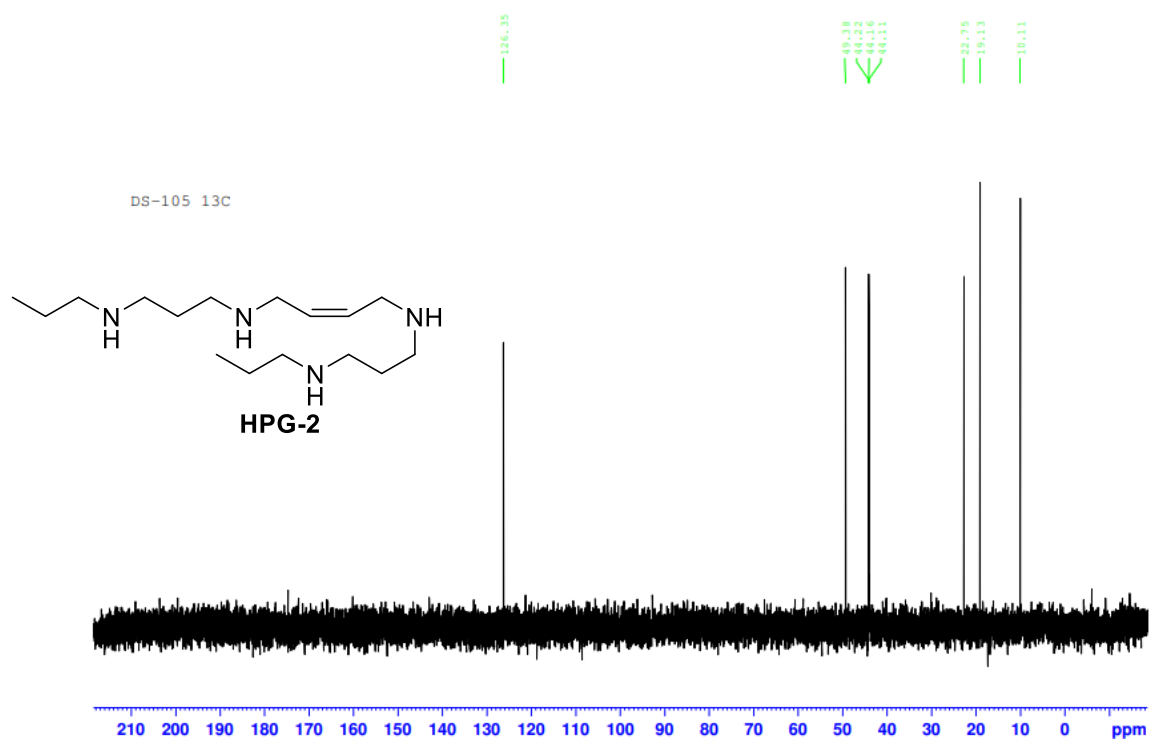

**Figure S2.**  $^{13}\text{C}$  NMR with  $\text{C}_3$  side chain (HPG-2)

20200714\_Sil\_DS\_105\_20200715114119 #8855 RT: 45.42

NL: 2.45E6

F:

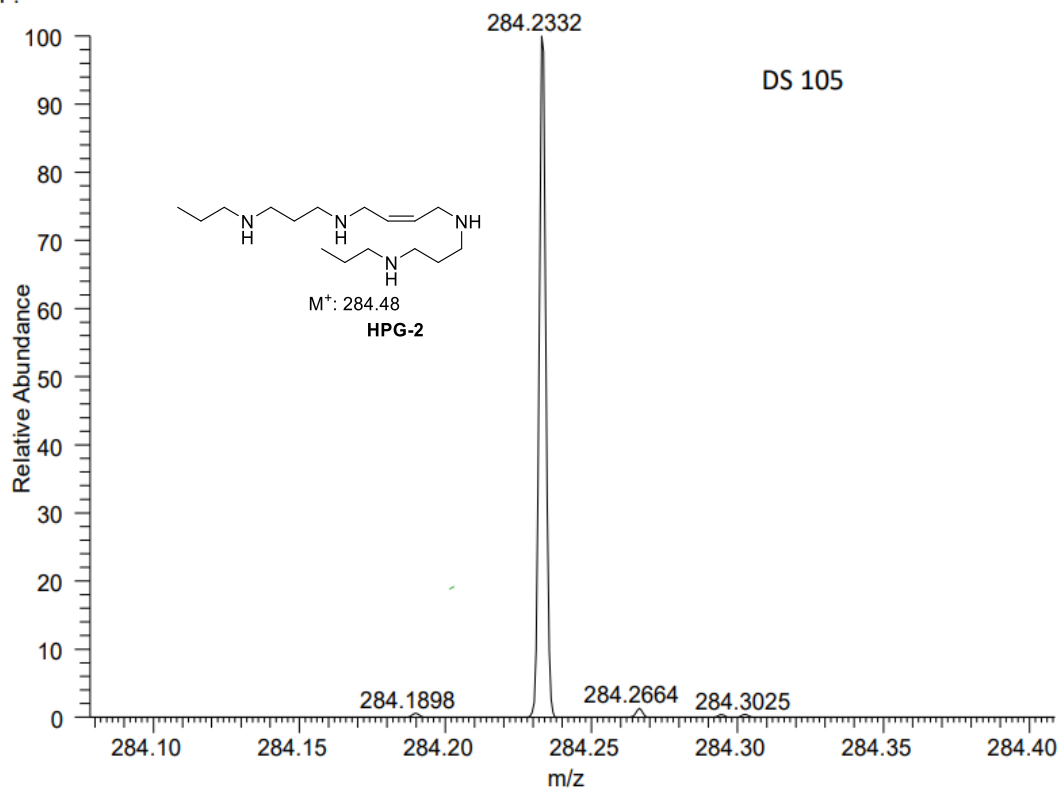

**Figure S3.** Mass analysis using Orbitrap Fusion of HPG-2

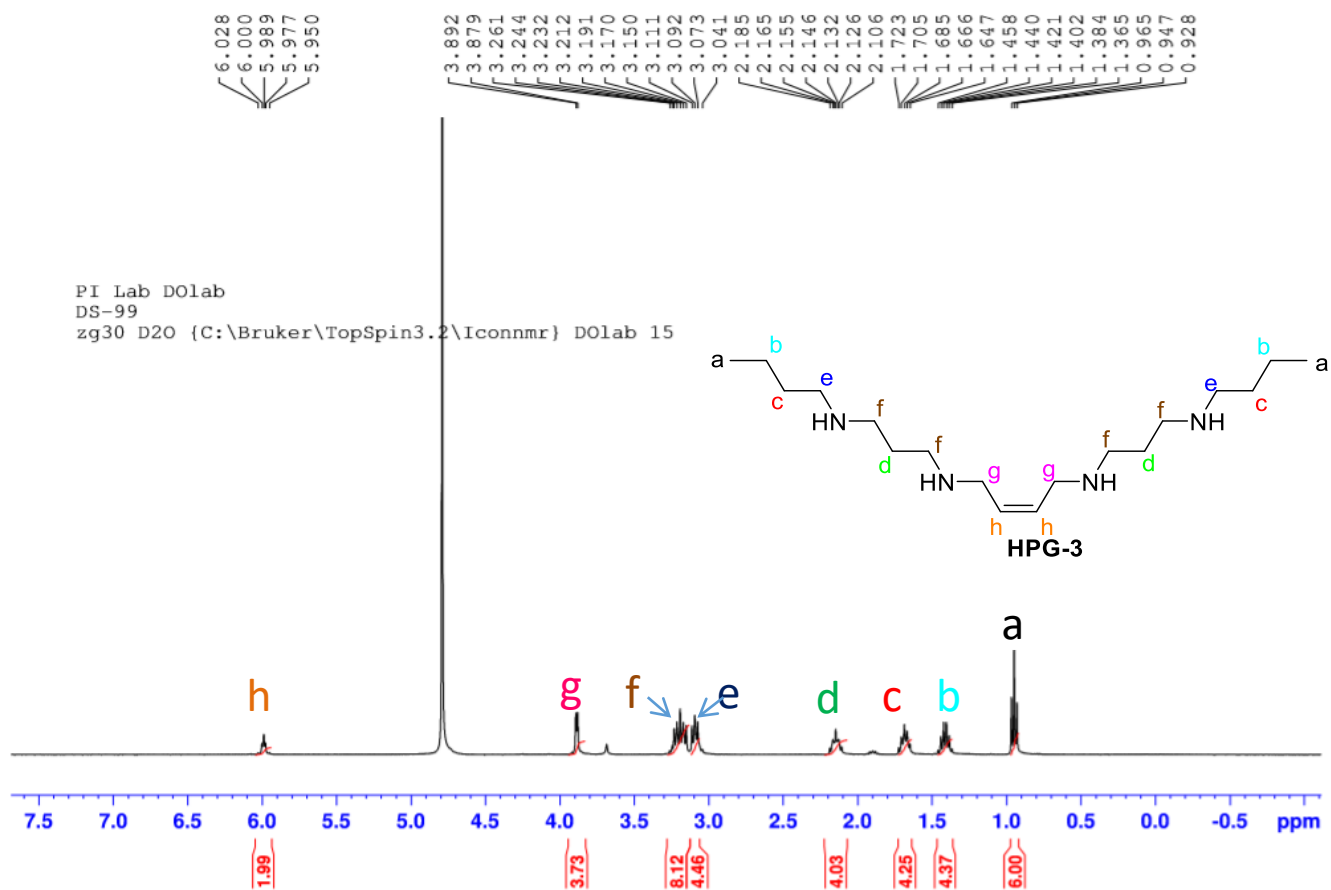

**Figure S4.**  $^1\text{H}$  NMR with  $\text{C}_4$  side chain (HPG-3)



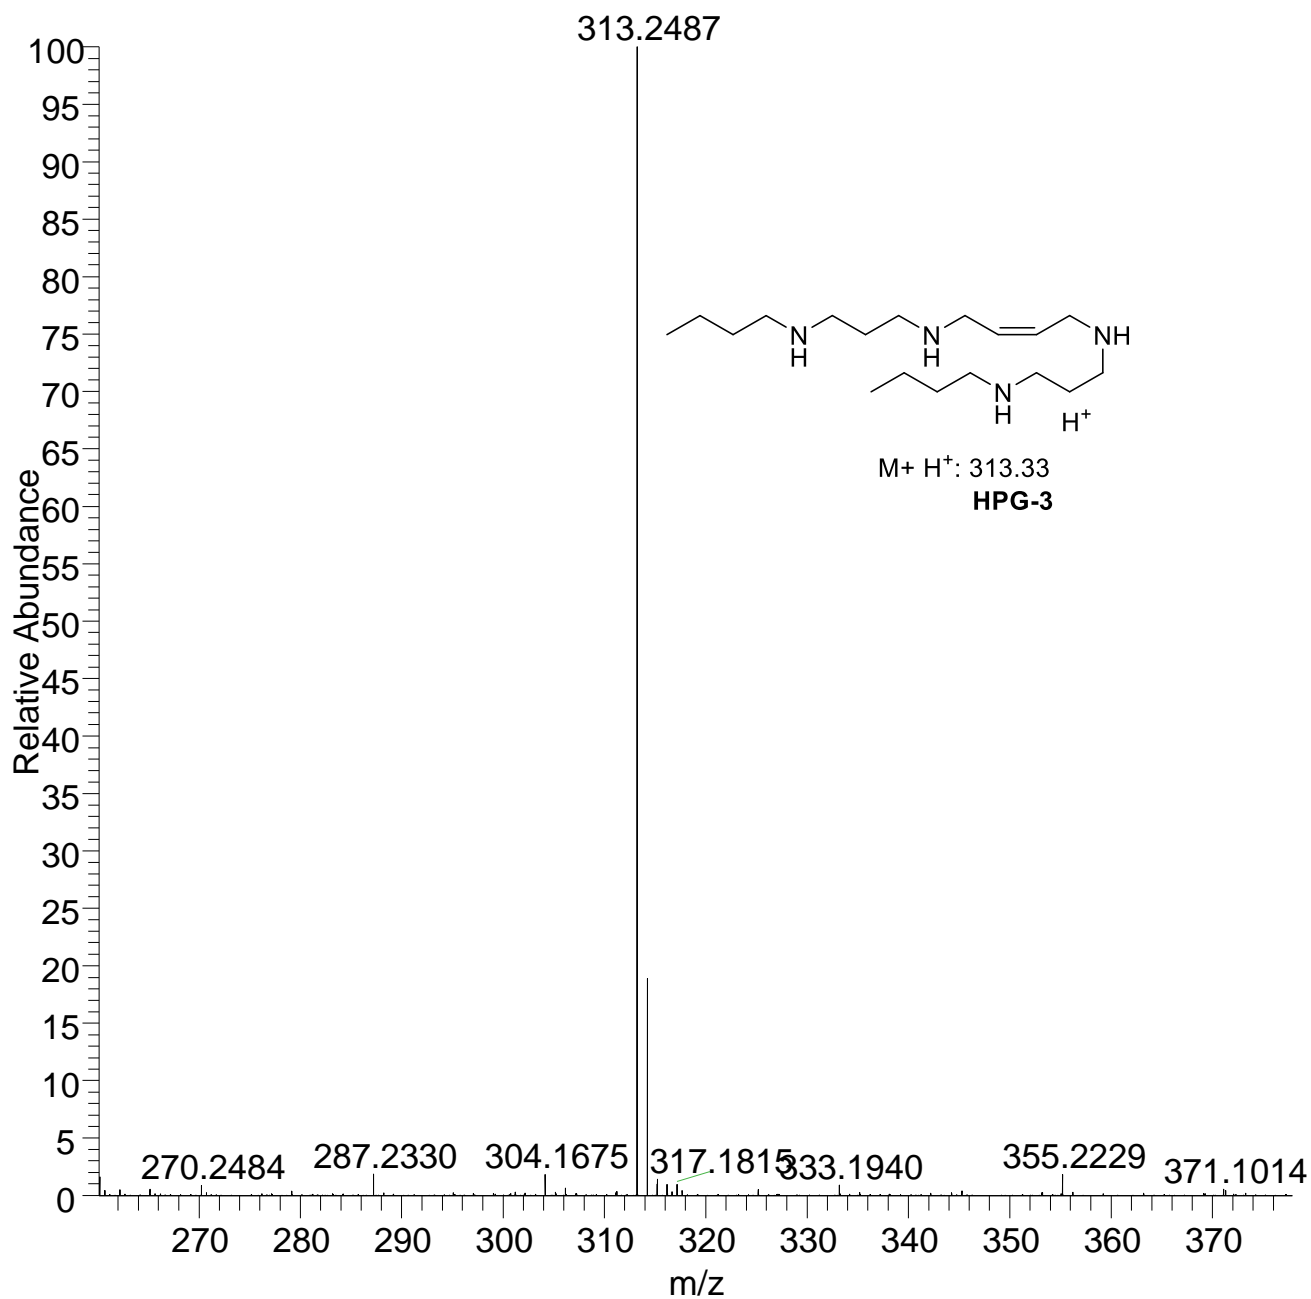

**Figure S6.** Mass analysis using Orbitrap Fusion of HPG-3

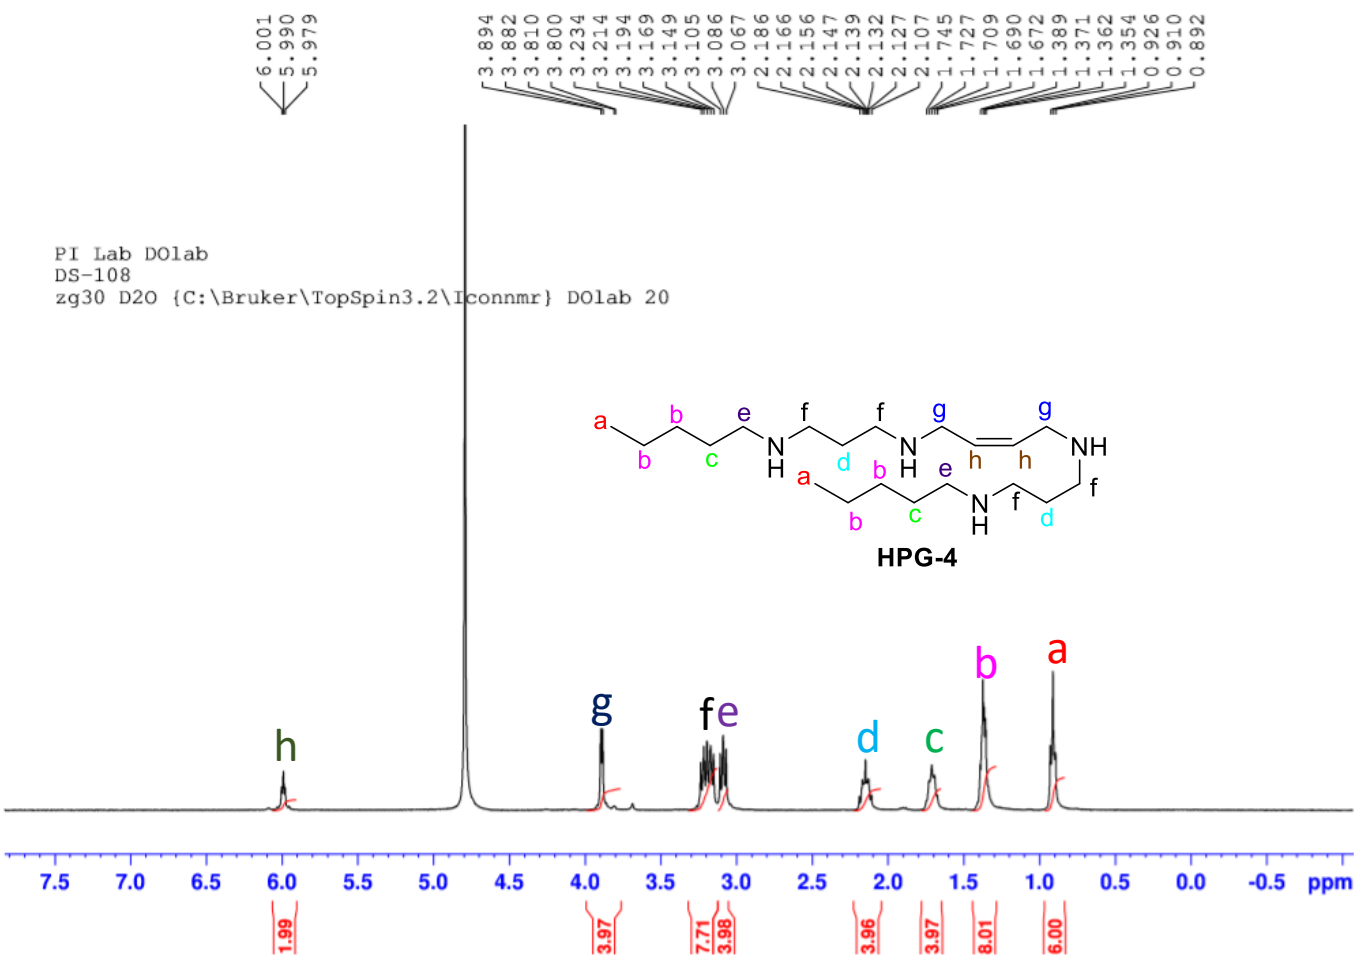

**Figure S7.**  $^1\text{H}$  NMR with  $\text{C}_5$  side chain (HPG-4)



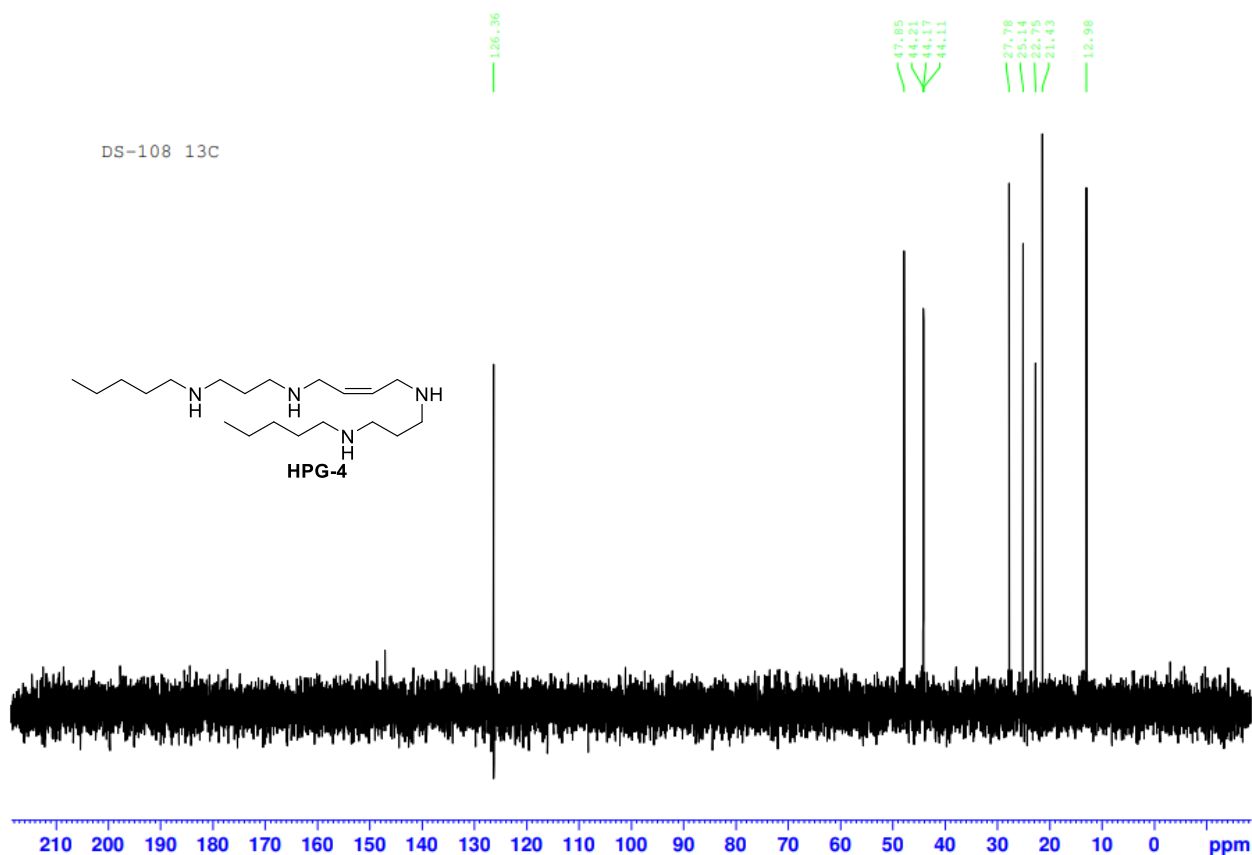

**Figure S8.** <sup>13</sup>C NMR with C<sub>5</sub> side chain (HPG-4)

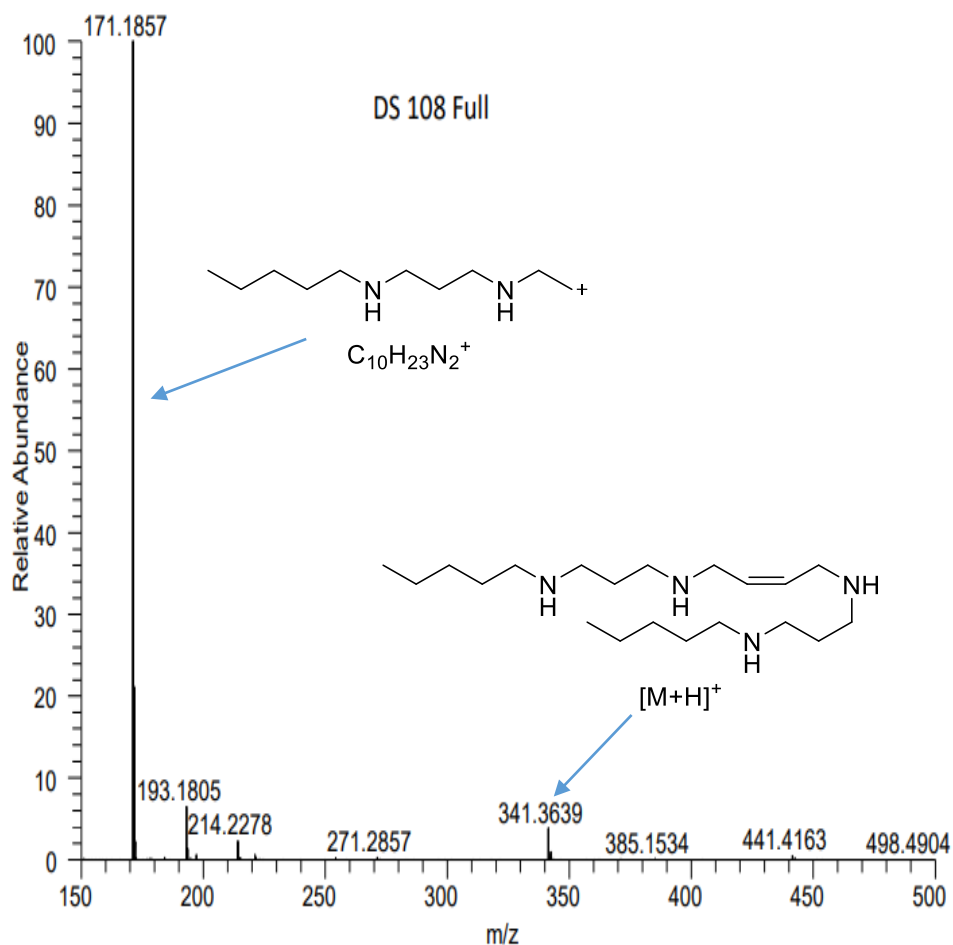

**Figure S9.** Orbitrap of (HPG-4) (Fragmented product)

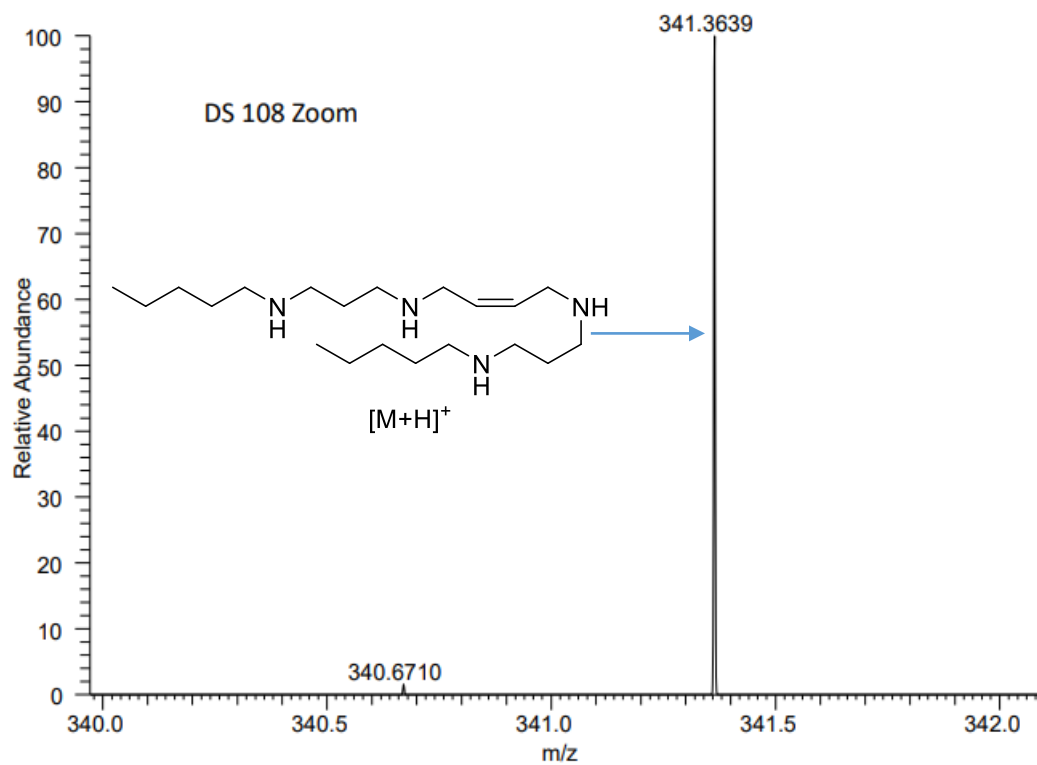

**Figure S10.** Orbitrap of (HPG-4)

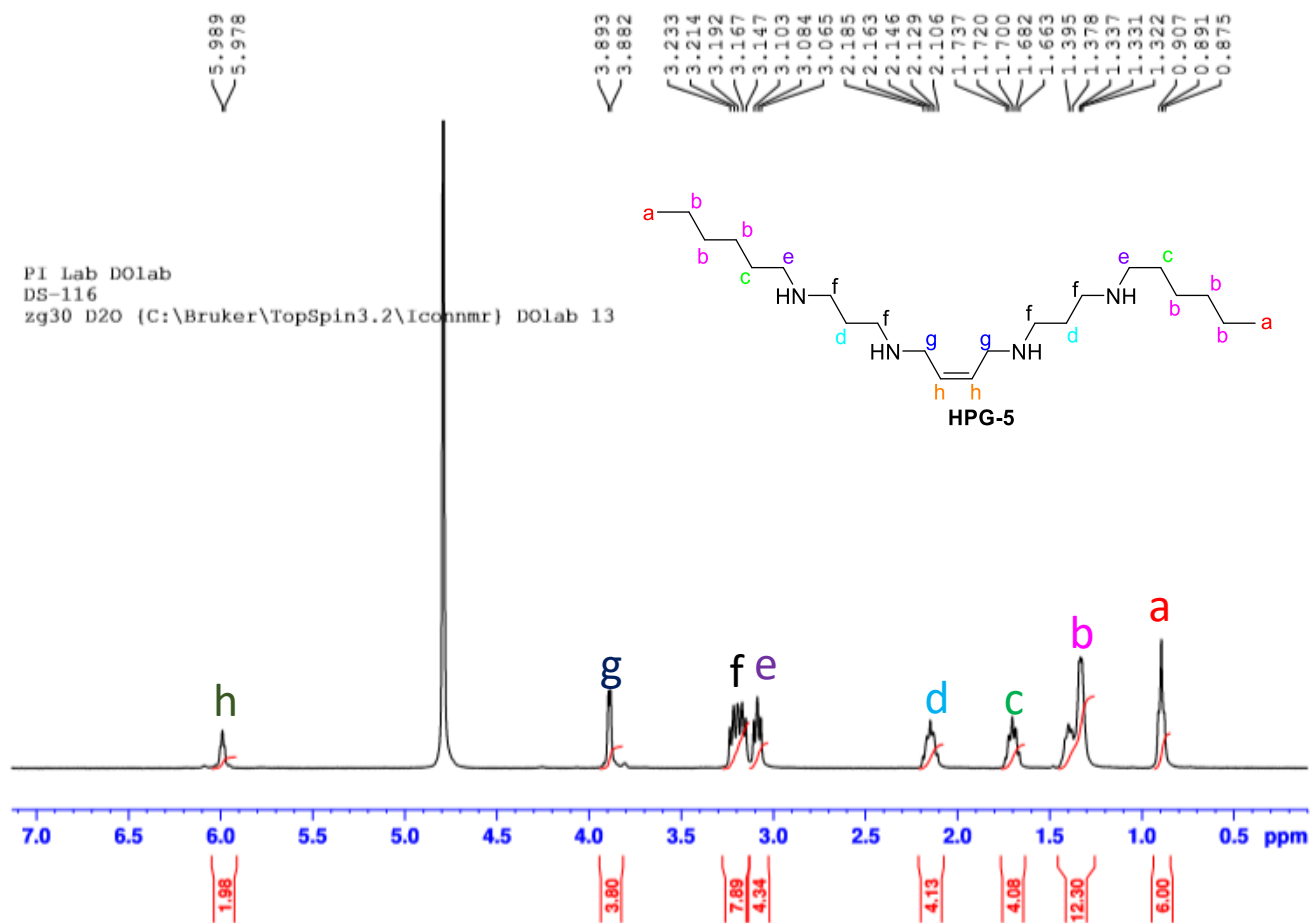

**Figure S11.**  $^1\text{H}$  NMR with  $\text{C}_6$  side chain (HPG-5)

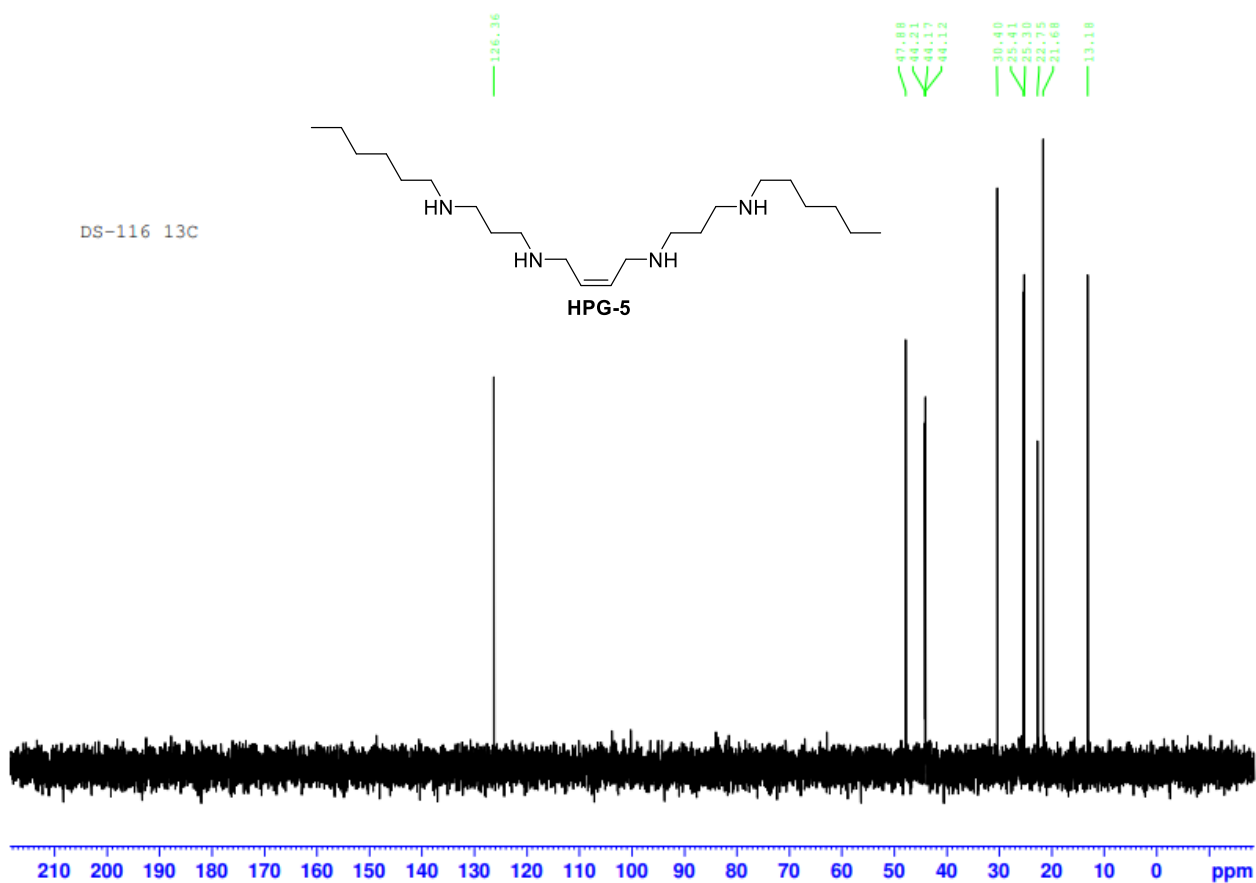

**Figure S12.** <sup>13</sup>C NMR with C<sub>6</sub> side chain (HPG-5)

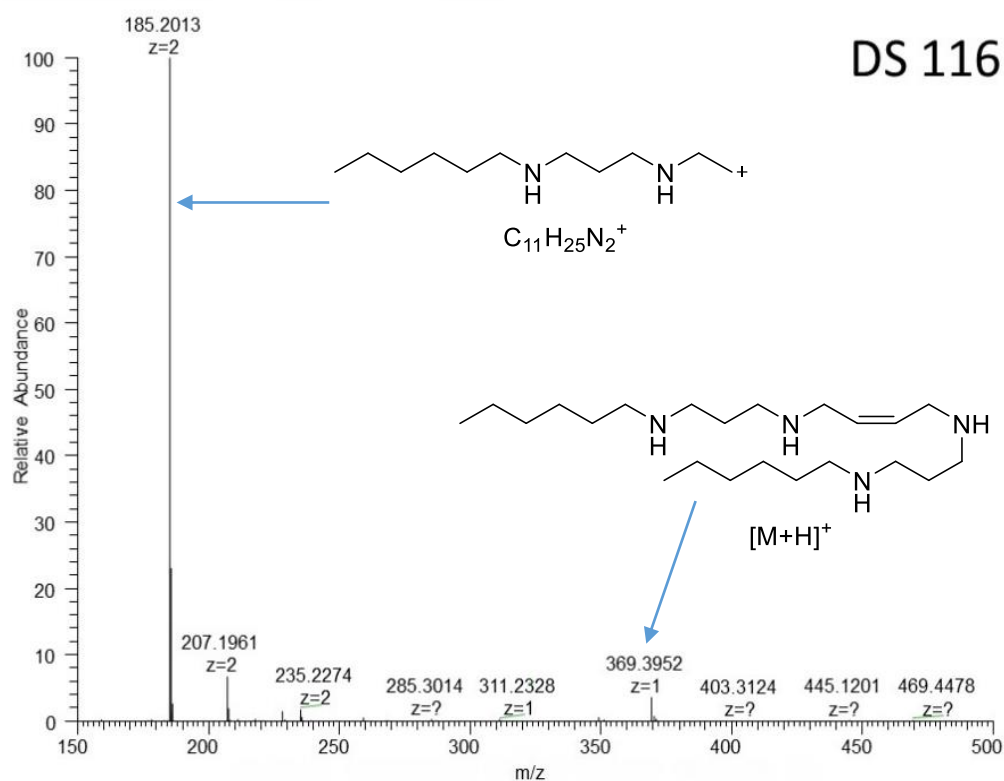

**Figure S13.** Orbitrap of (HPG-5) (Fragmented product)

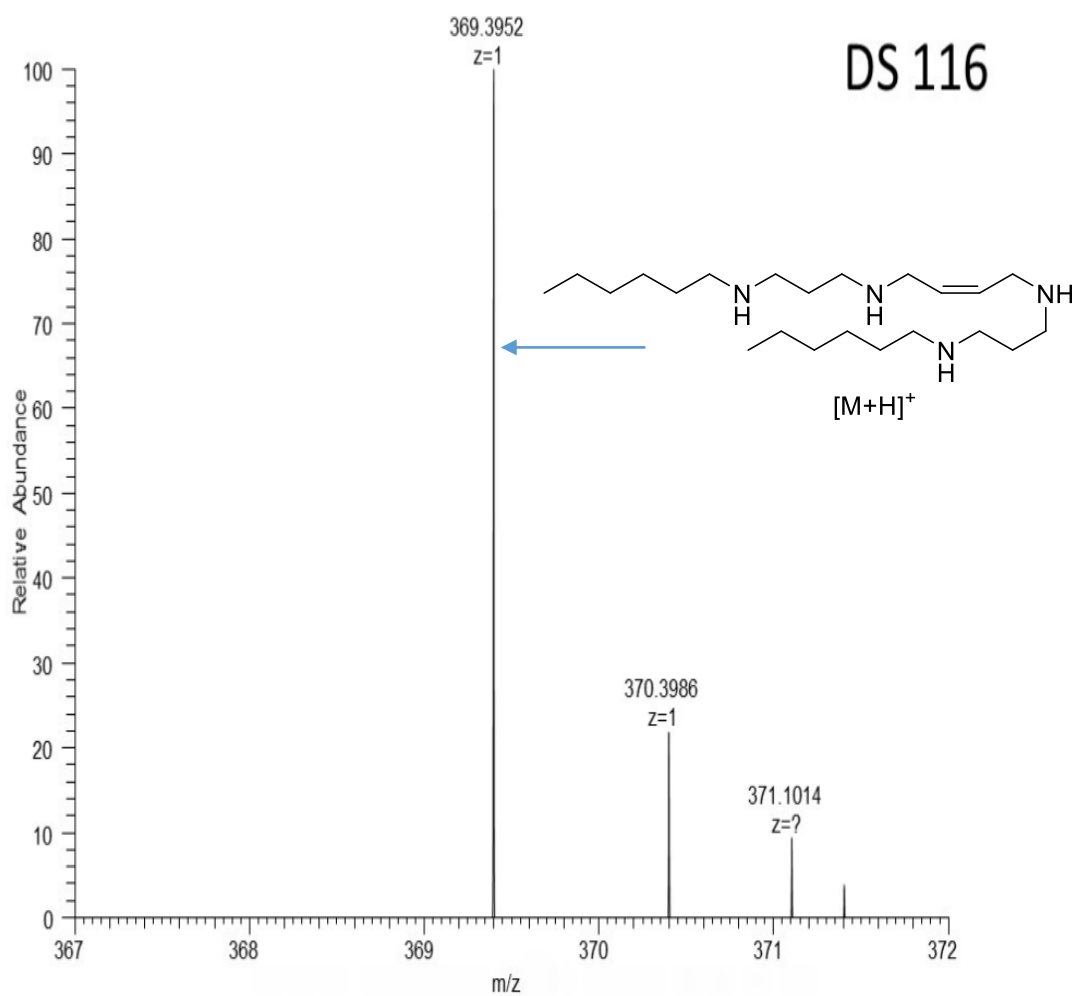

**Figure S14.** Orbitrap of (HPG-5)

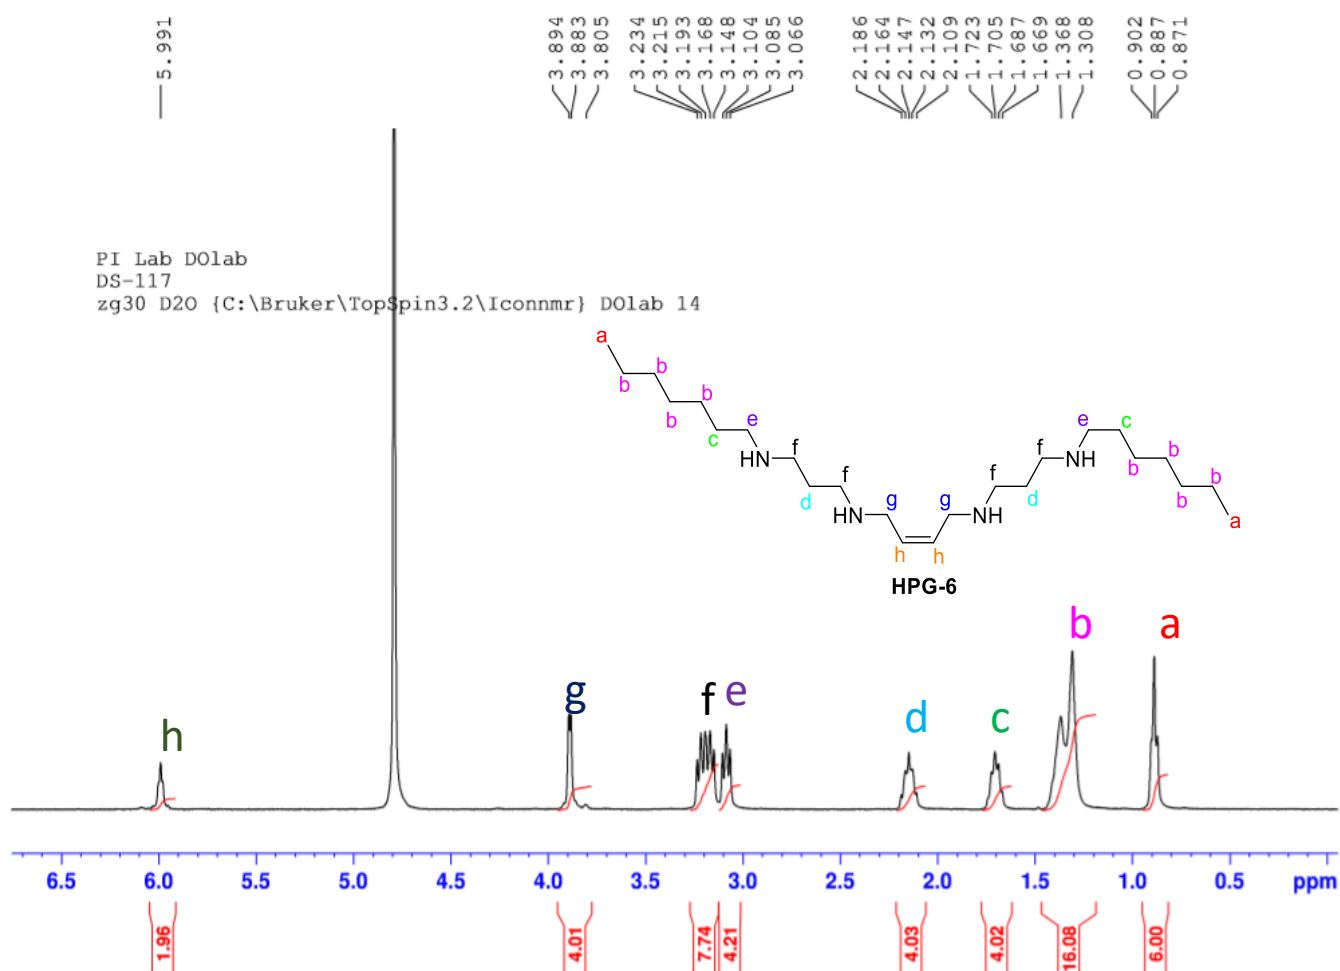

**Figure S15.** <sup>1</sup>H NMR with C<sub>7</sub> side chain (HPG-6)



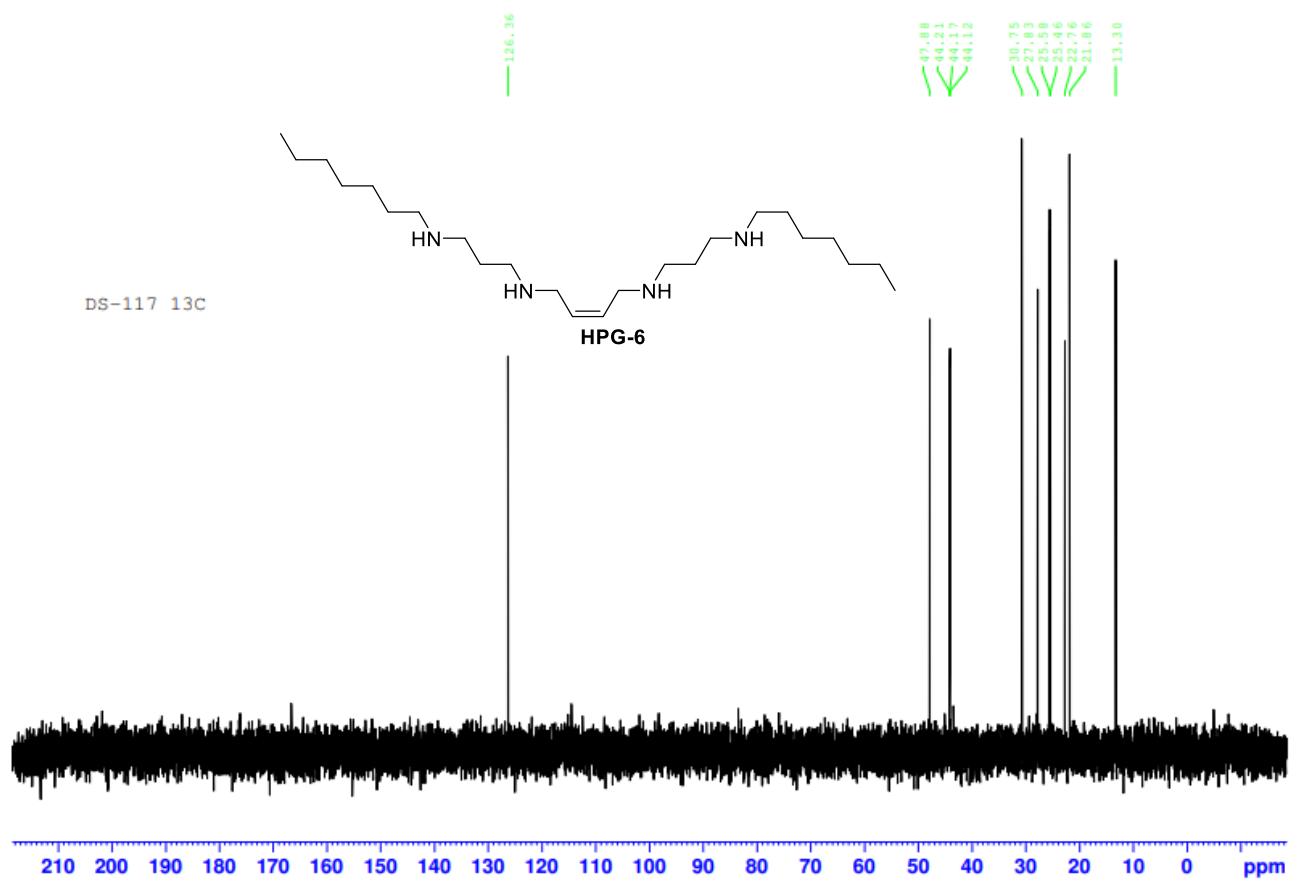

**Figure S16.**  $^{13}\text{C}$  NMR with  $\text{C}_7$  side chain (HPG-6)

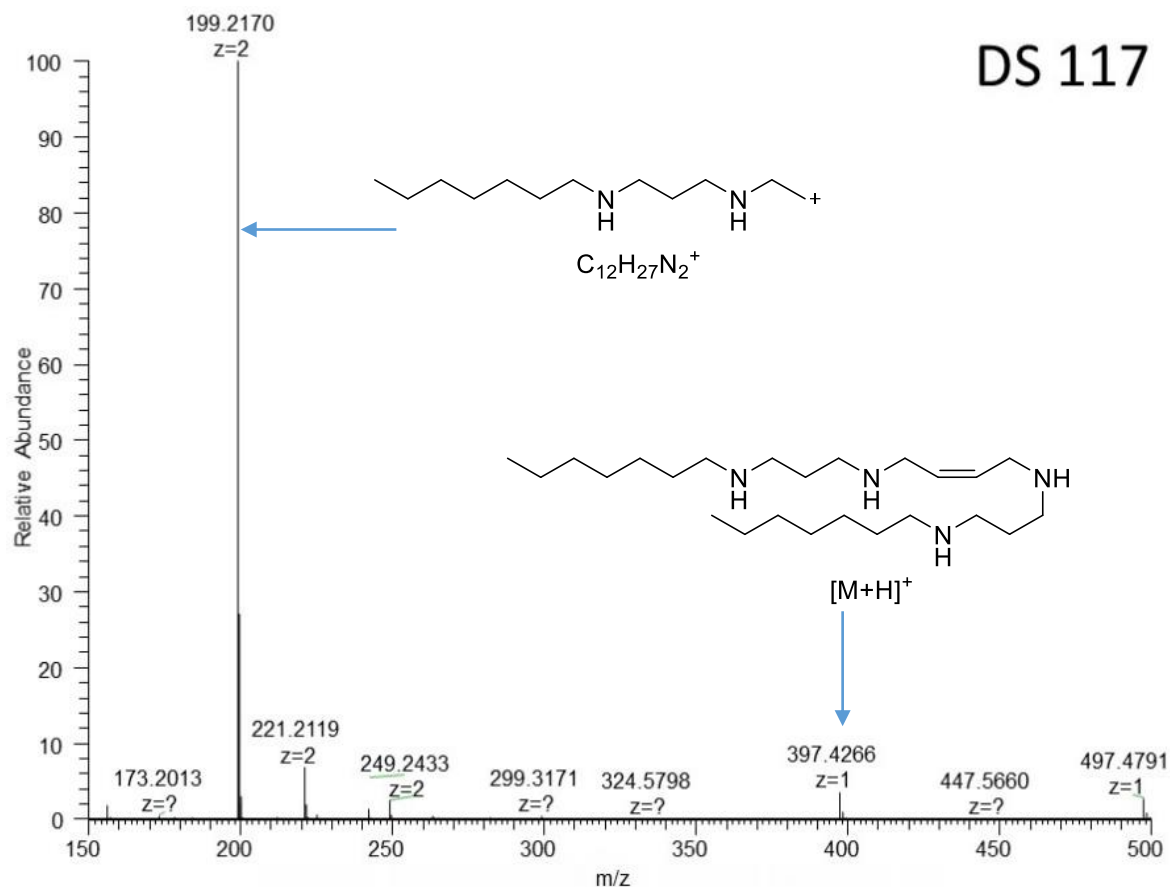

**Figure S17.** Orbitrap of (HPG-6) (Fragmented product)

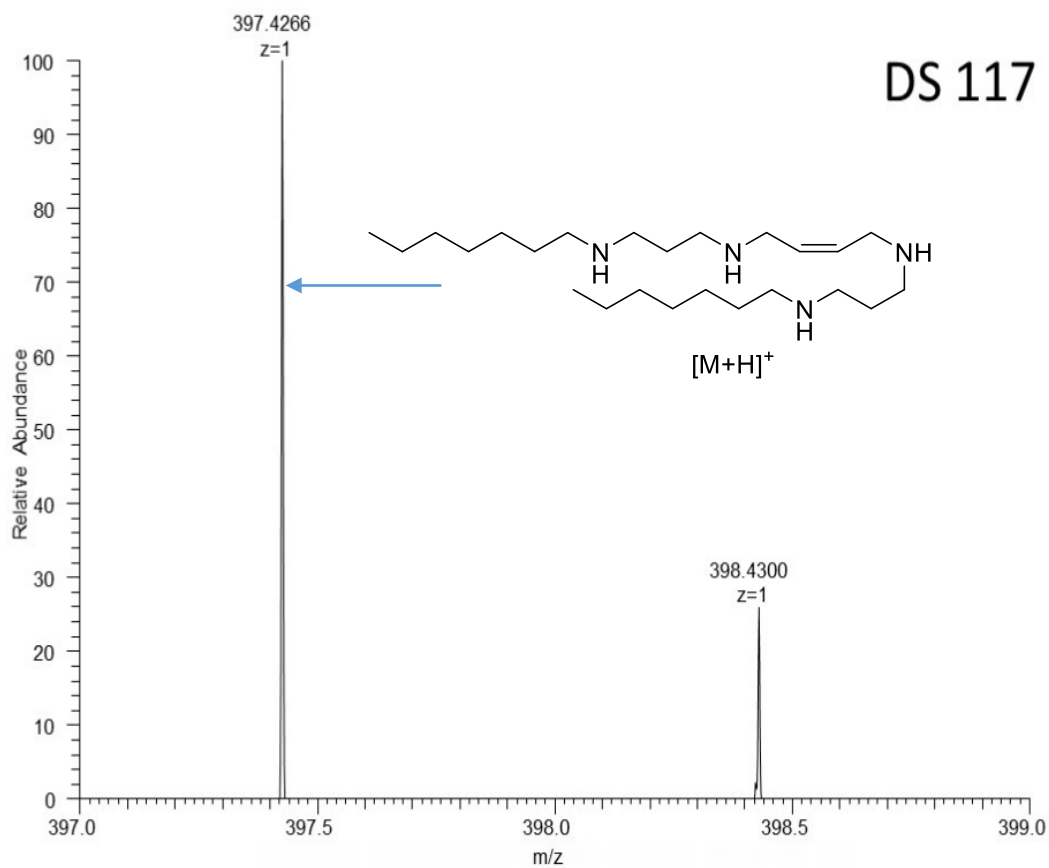

**Figure S18.** Orbitrap of (HPG-6)

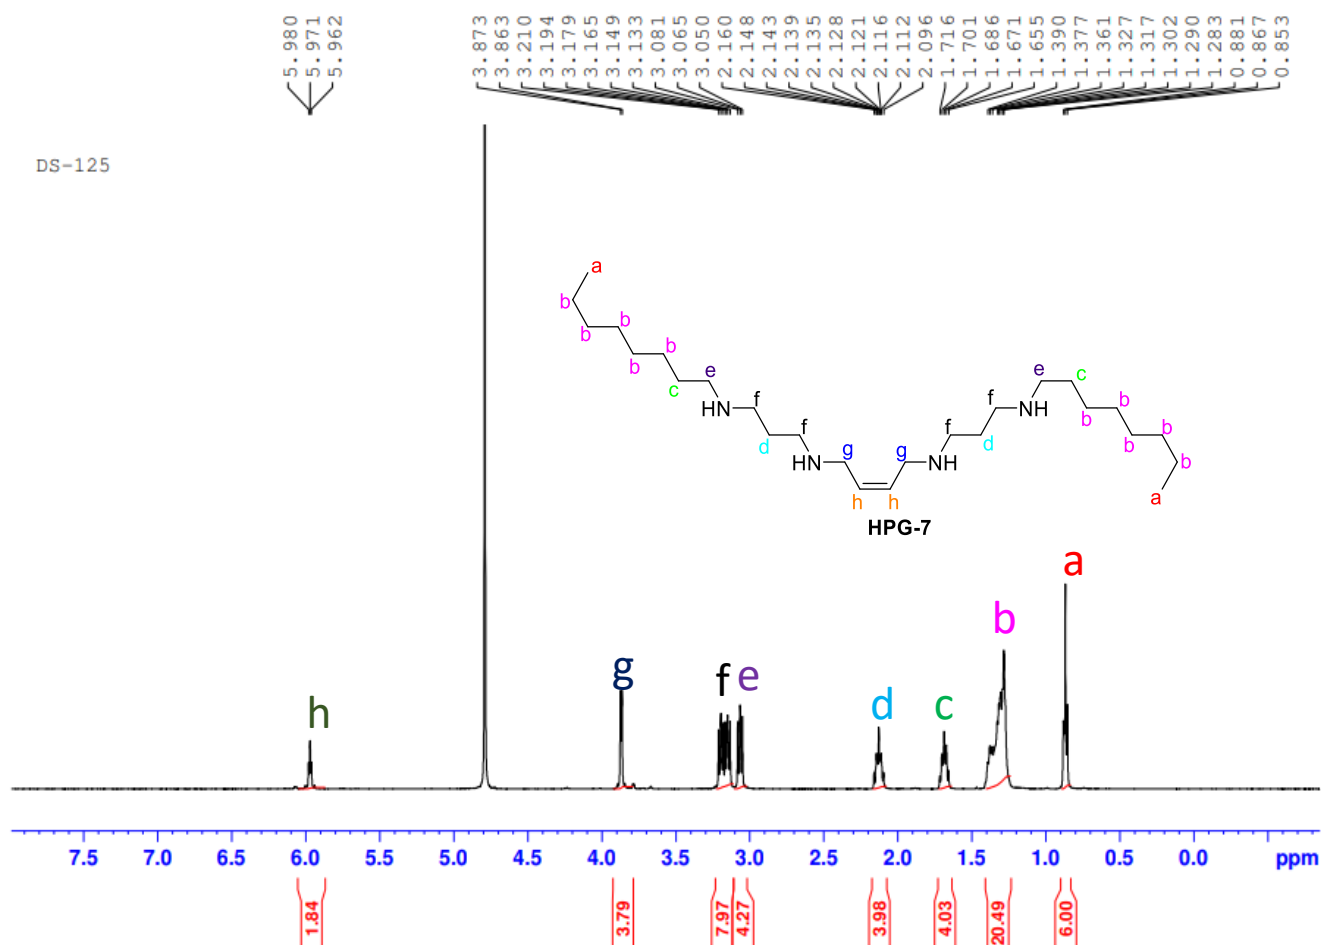

**Figure S19.** <sup>1</sup>H NMR with C<sub>8</sub> side chain (HPG-7)

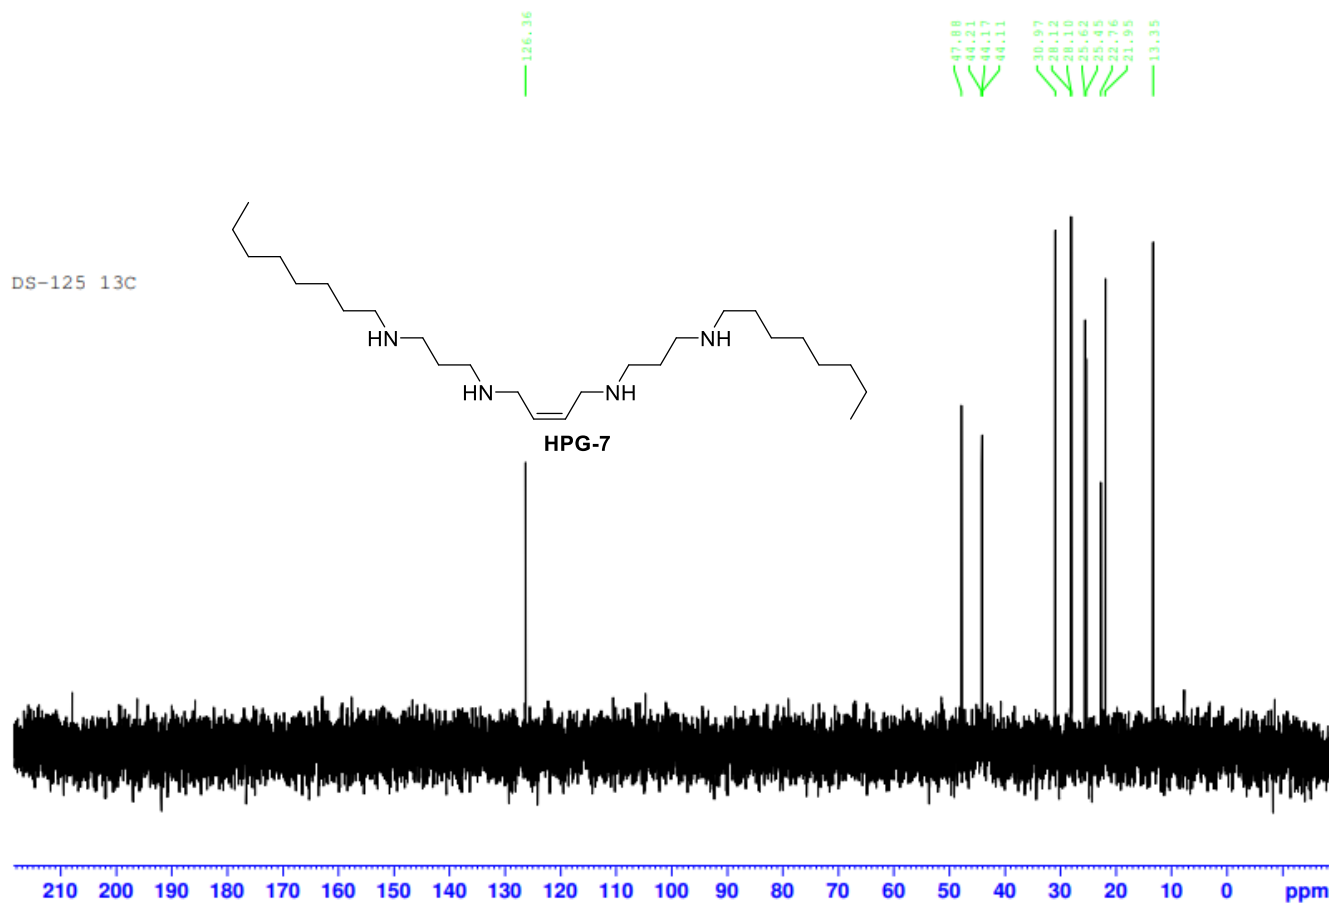

**Figure S20.** <sup>13</sup>C NMR with C<sub>8</sub> side chain (HPG-7)

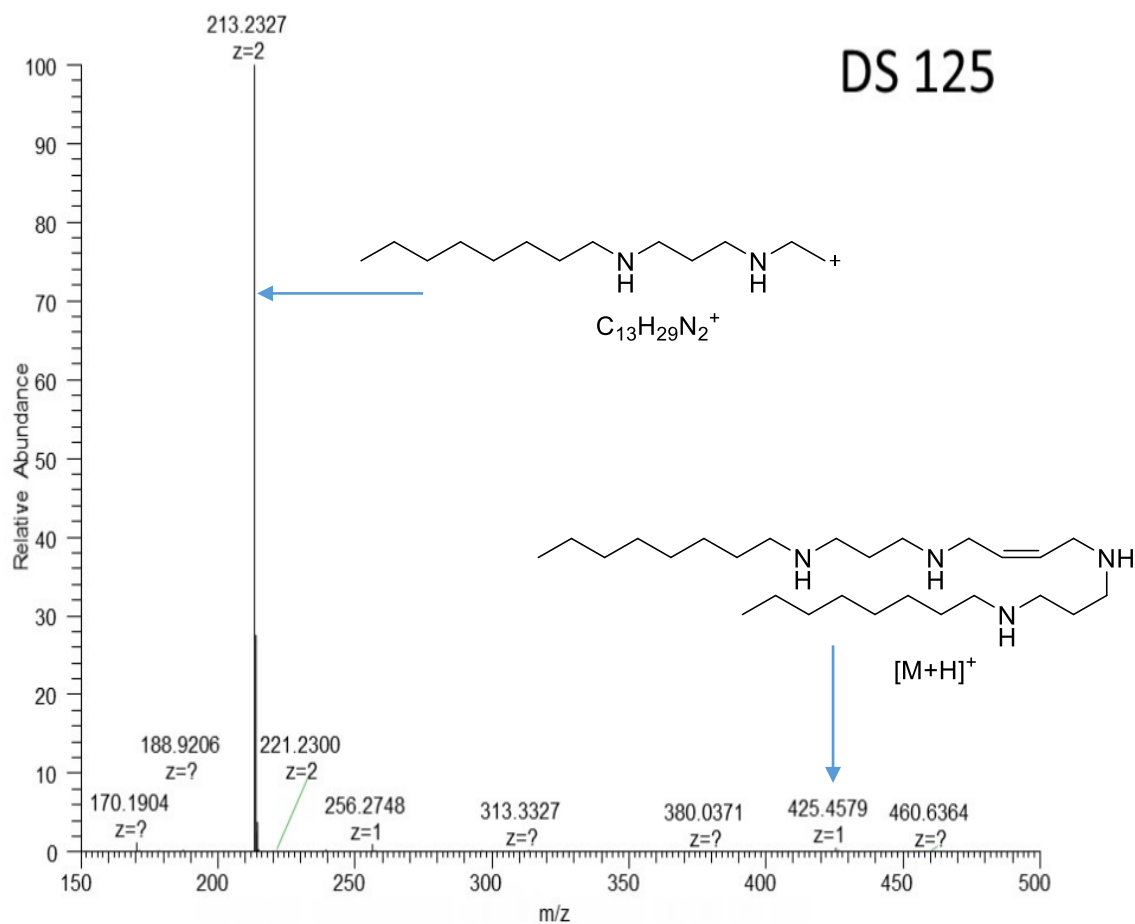

**Figure S21.** Orbitrap of (HPG-7) (Fragmented product)

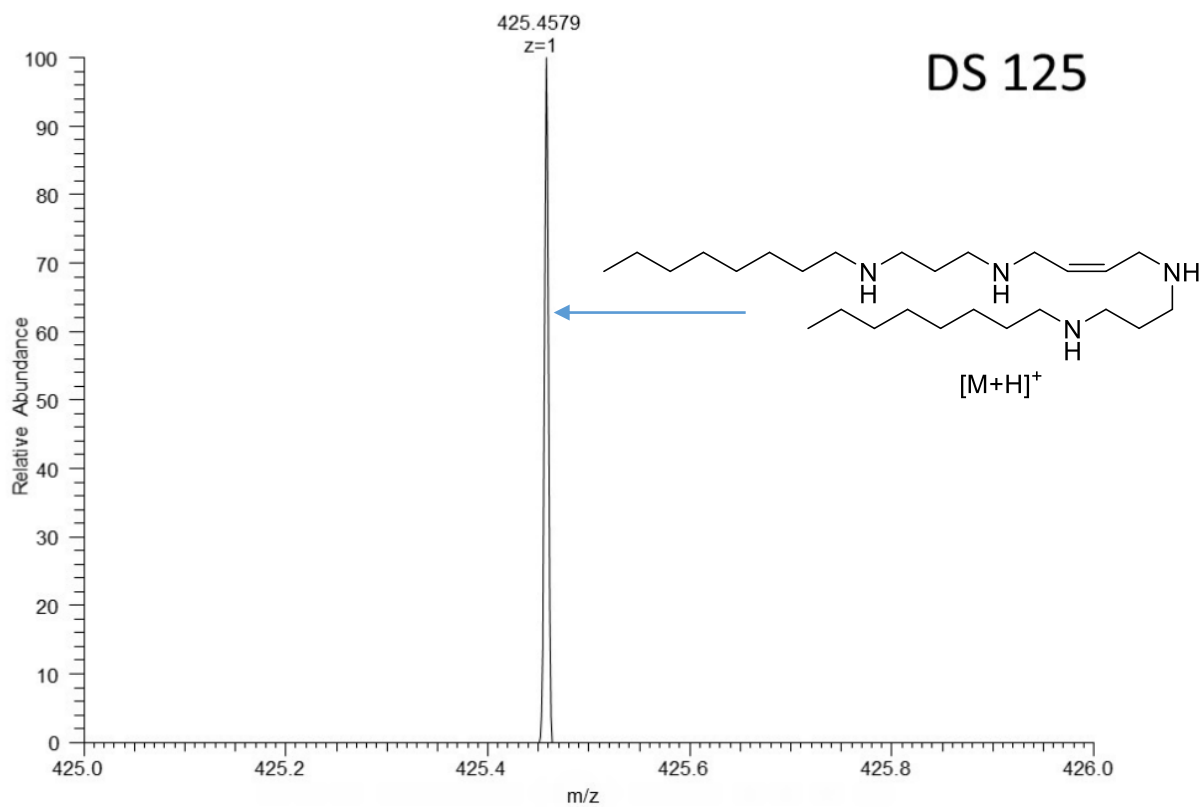

**Figure S22.** Orbitrap of (HPG-7)

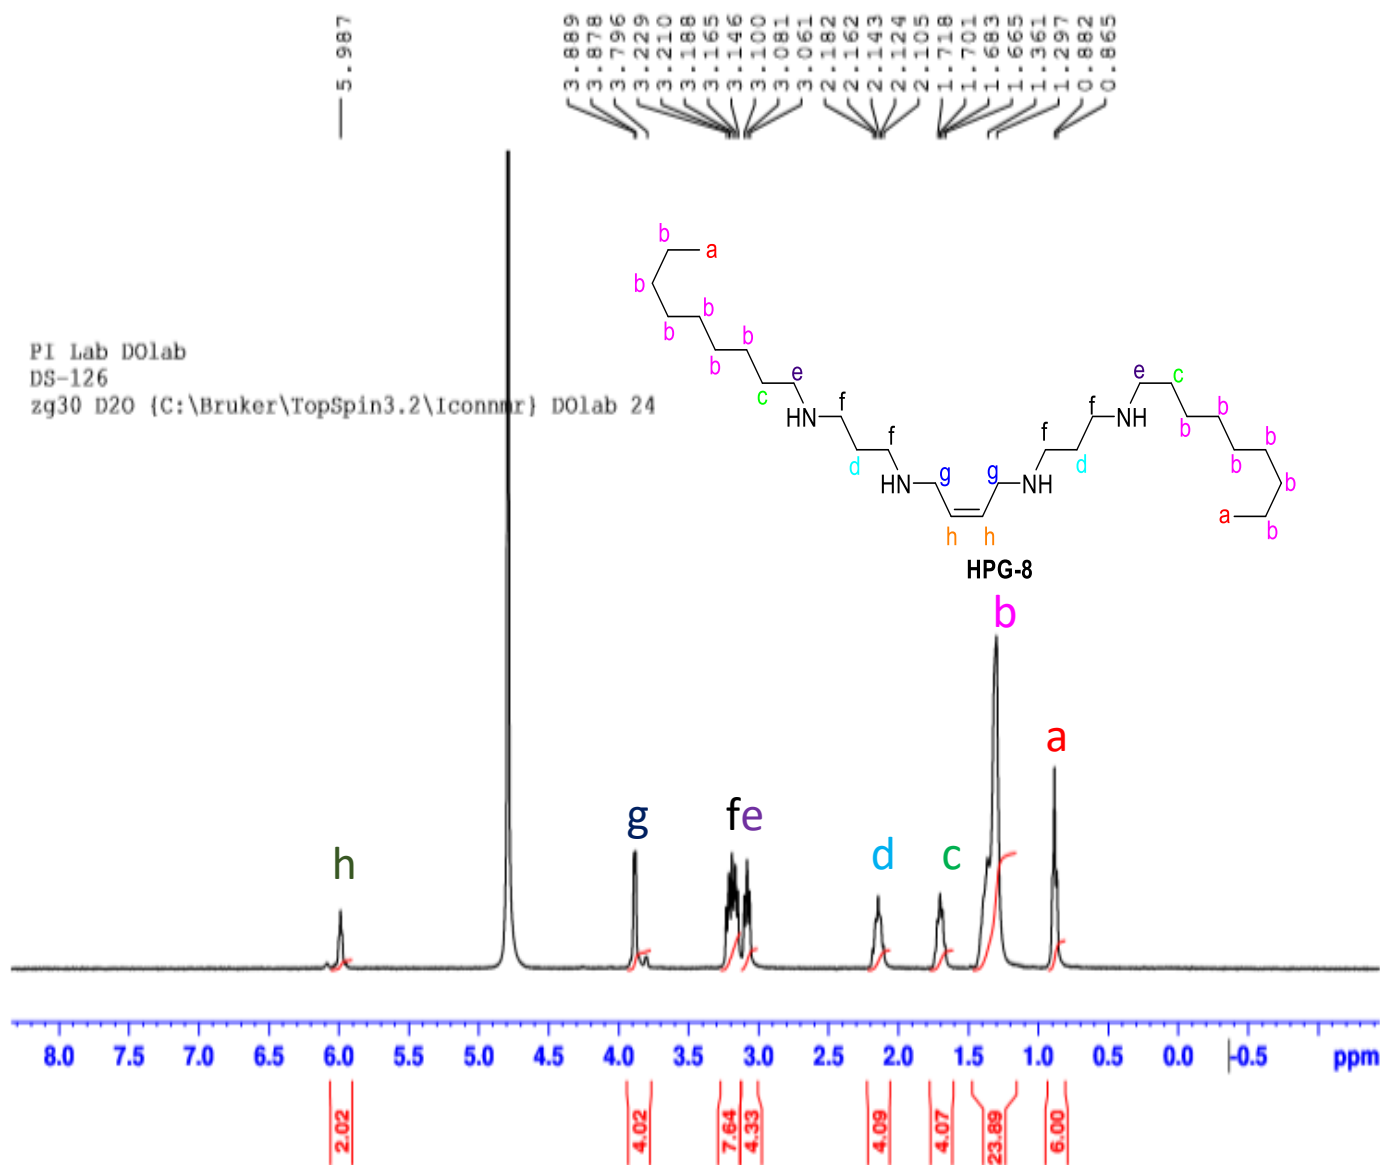

**Figure S23.** <sup>1</sup>H NMR with C<sub>9</sub> side chain (HPG-8)



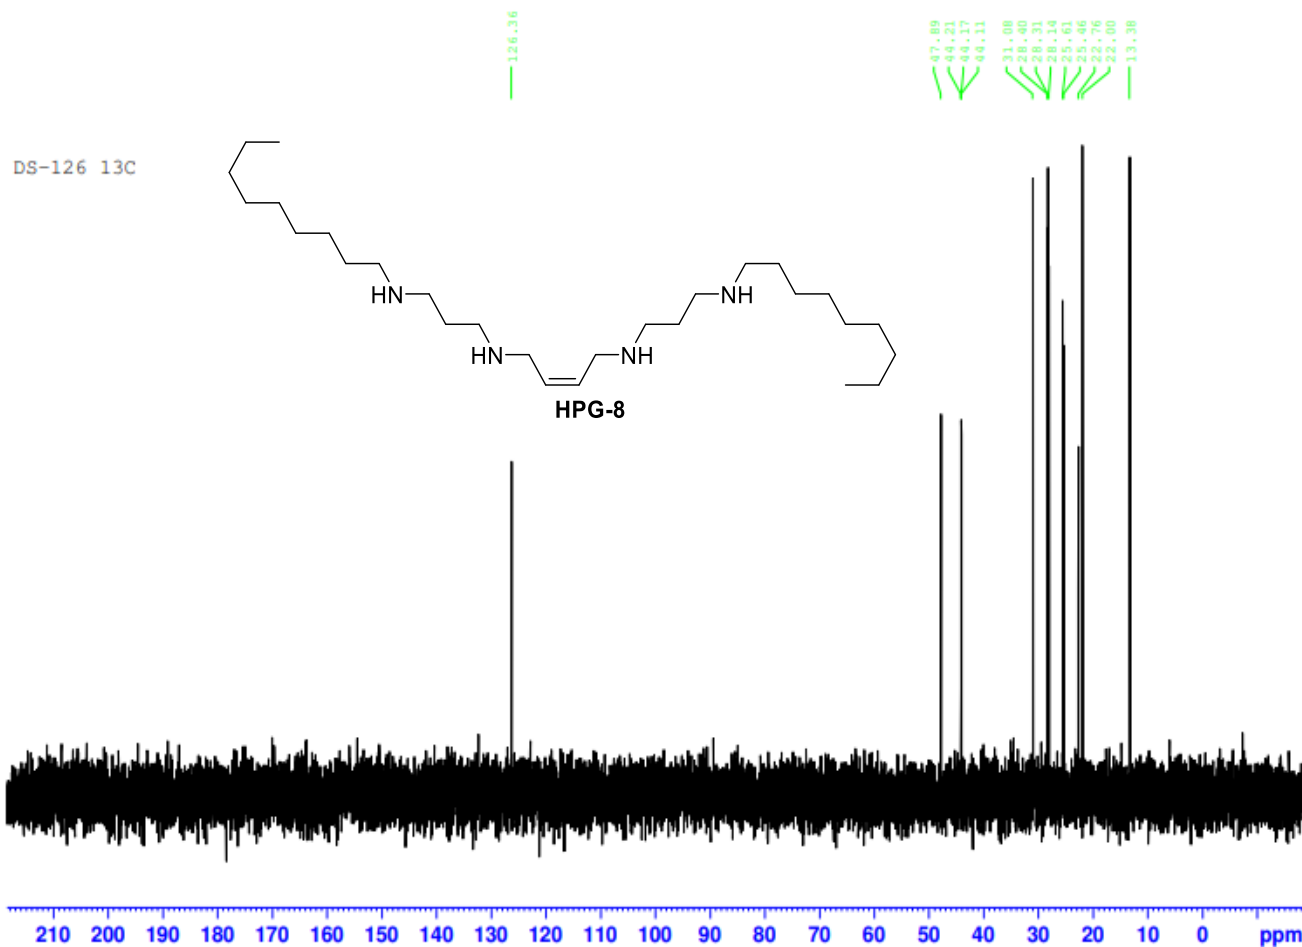

**Figure S24.** <sup>13</sup>C NMR with C<sub>9</sub> side chain (HPG-8)

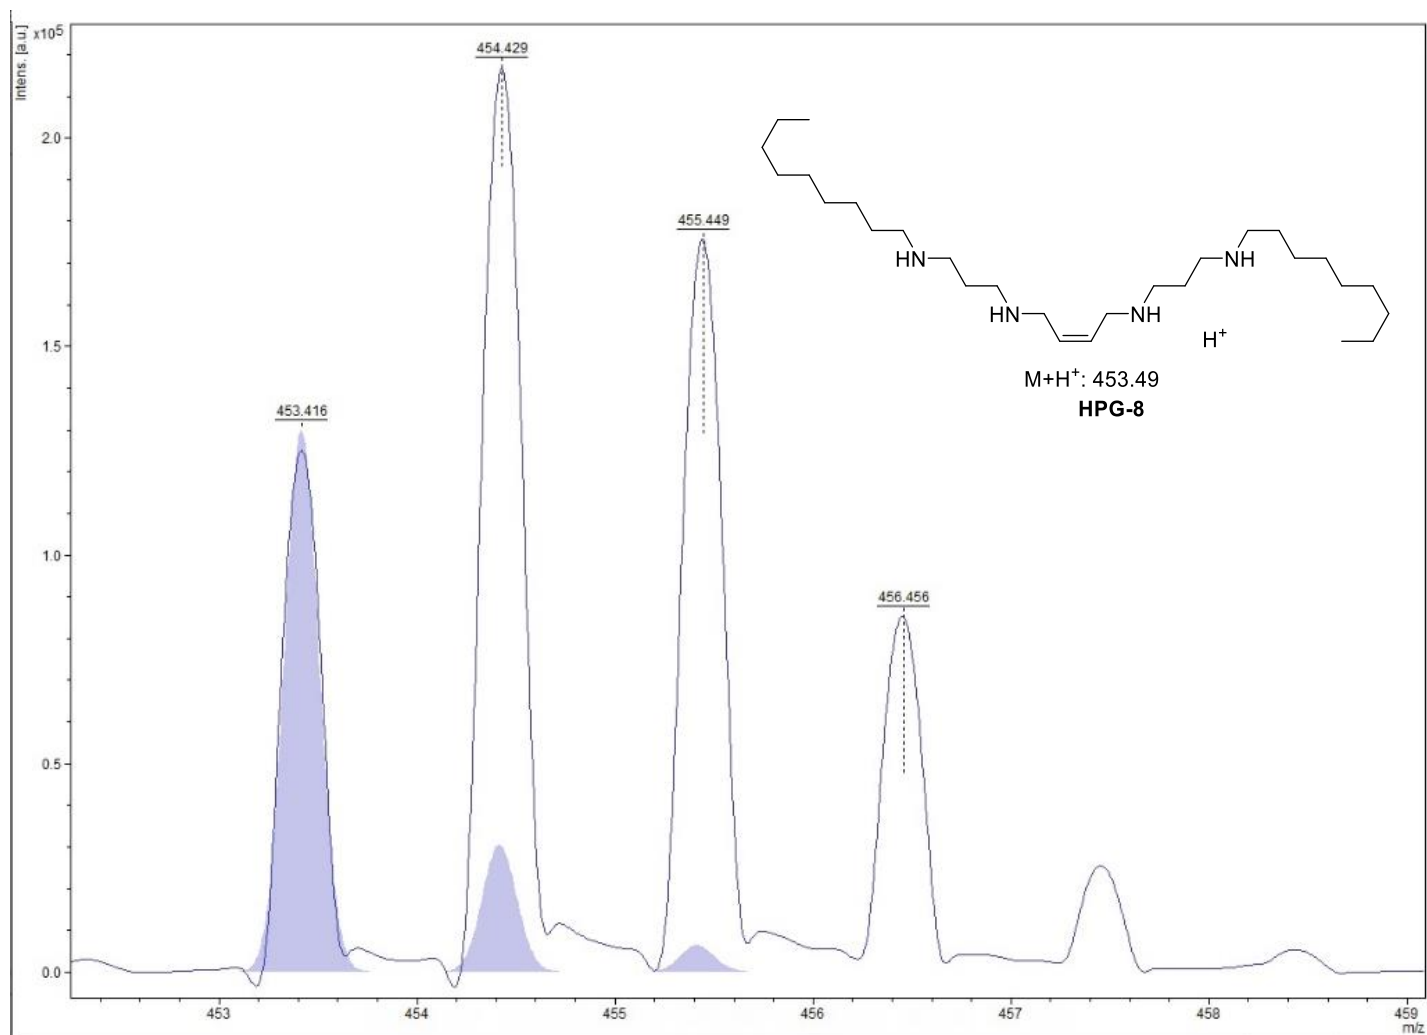

**Figure S25.** Mass analysis using MALDI of (HPG-8)
